# Supplementary material for: New Insights into the Interaction of Class II Dihydroorotate Dehydrogenases with Ubiquinone in Lipid Bilayers as a Function of Lipid Composition
Source: MDPI journal article supplement (doi:10.3390/ijms23052437), 2022-02-23
Supplement: s1 [file s1]

## SUPPLEMENTARY MATERIAL

# New insights into the interaction of Class II dihydroorotate dehydrogenases with ubiquinone in lipid bilayers as a function of lipid composition

**Juan Manuel Orozco Rodriguez<sup>1</sup>, Hanna P. Wacklin-Knecht<sup>2,3\*</sup>, Luke A. Clifton<sup>4</sup>, Oliver Bogojevic<sup>3‡</sup>, Anna Leung<sup>3</sup>, Giovanna Fragneto<sup>5</sup>, Wolfgang Knecht<sup>1\*</sup>**

<sup>1</sup> Department of Biology & Lund Protein Production Platform, Lund University, Sölvegatan 35, 22362 Lund, Sweden; JM.OR.: manuel.orozco@biol.lu.se; W.K.: wolfgang.knecht@biol.lu.se

<sup>2</sup> Department of Chemistry, Division of Physical Chemistry, Lund University, Naturvetarvägen 26, 22241 Lund, Sweden; hanna.wacklin-knecht@ess.eu

<sup>3</sup> European Spallation Source ERIC, Box 176, 221 00 Lund, Sweden; H.WK.: hanna.wacklin-knecht@ess.eu; O.B.: olbo@bce.au.dk; A.L.: anna.leung@ess.eu

<sup>4</sup> ISIS Pulsed Neutron and Muon Source, Rutherford Appleton Laboratory, Didcot OX11 0QX, United Kingdom; luke.clifton@stfc.ac.uk

<sup>5</sup> Institut Laue-Langevin, 71 Avenue des Martyrs, BP 156, 38042 Grenoble, France; fragneto@ill.fr

\* Correspondence: H.WK.: hanna.wacklin-knecht@ess.eu; W.K.: wolfgang.knecht@biol.lu.se

‡ Current address: Department of Biological and Chemical Engineering - Faculty of Technical Sciences, Aarhus University, Gustav Wieds Vej 10, 8000 Aarhus C, Denmark, email: olbo@bce.au.dk

**Table S1.** Overview about the NR measurements performed in this study.

| Lipid bilayer (mol%)                                                         | DHODH                           |                              | Instrument (Location)   |
|------------------------------------------------------------------------------|---------------------------------|------------------------------|-------------------------|
| POPC and 10% TOCL                                                            | <i>Hs</i> Δ29DHODH <sup>a</sup> | <i>Ec</i> DHODH <sup>d</sup> | INTER (ISIS)/D17 (ILL)  |
| d <sub>63</sub> -POPC and 10% TOCL                                           | <i>Hs</i> Δ29DHODH <sup>b</sup> |                              | INTER (ISIS)            |
| POPC, 10% TOCL and 10% Q <sub>10</sub>                                       | <i>Hs</i> Δ29DHODH <sup>a</sup> | <i>Ec</i> DHODH <sup>d</sup> | INTER (ISIS) /D17 (ILL) |
| d <sub>63</sub> -POPC, 10% TOCL and 10% Q <sub>10</sub>                      | <i>Hs</i> Δ29DHODH <sup>b</sup> |                              | INTER (ISIS)            |
| hIMM mimic (52% PC, 27% PS, 14% PE, 4% PI and 3% CL)                         | <i>Hs</i> Δ29DHODH <sup>c</sup> |                              | D17 (ILL)               |
| hIMM mimic (52% PC, 27% PS, 14% PE, 4% PI and 3% CL) and 10% Q <sub>10</sub> | <i>Hs</i> Δ29DHODH <sup>c</sup> |                              | D17 (ILL)               |
| Bacterial Mimic (40% POPC, 35% POPE, 13% POPG and 12% TOCL)                  |                                 | <i>Ec</i> DHODH <sup>d</sup> | D17 (ILL)               |

<sup>a</sup> Ref. [81]

<sup>b</sup> Ref. [82]

<sup>c</sup> Ref. [80]

<sup>d</sup> Ref. [79]

**Table S2.** Neutron scattering length densities and molecular volumes used in this study.

|                                                                        | POPC                  | TOCL                                                                            | POPE                                                                            | POPG                                                                            | POPS                                                                            | Q <sub>10</sub>                  | <i>C. glabrata</i><br>phospholipids                                                                                             |
|------------------------------------------------------------------------|-----------------------|---------------------------------------------------------------------------------|---------------------------------------------------------------------------------|---------------------------------------------------------------------------------|---------------------------------------------------------------------------------|----------------------------------|---------------------------------------------------------------------------------------------------------------------------------|
| V <sub>head</sub> (Å <sup>3</sup> ) <sup>a</sup>                       | 322 [61]              | 490 [62]                                                                        | 245 [63]                                                                        | 289 [64]                                                                        | 278 [65]                                                                        | 252 <sup>d</sup>                 | 305 <sup>h</sup>                                                                                                                |
| V <sub>chains</sub> (Å <sup>3</sup> ) <sup>b</sup>                     | 934 [61]              | 1890 [62]                                                                       | 934 [61]                                                                        | 934 [61]                                                                        | 934 [61]                                                                        | 1324 <sup>e</sup>                | 942 <sup>h</sup>                                                                                                                |
| SLD <sub>head</sub> (10 <sup>-6</sup> Å <sup>-2</sup> ) <sup>c</sup>   | 1.86                  | 2.98 (D <sub>2</sub> O)<br>2.91 (CM4)<br>2.85 (CMSi)<br>2.77 (H <sub>2</sub> O) | 4.03 (D <sub>2</sub> O)<br>3.57 (CM4)<br>3.19 (CMSi)<br>2.68 (H <sub>2</sub> O) | 3.19 (D <sub>2</sub> O)<br>2.95 (CM4)<br>2.75 (CMSi)<br>2.47 (H <sub>2</sub> O) | 4.39 (D <sub>2</sub> O)<br>3.99 (CM4)<br>3.65 (CMSi)<br>3.20 (H <sub>2</sub> O) | 1.81                             | 3.0 <sup>h</sup> (D <sub>2</sub> O)<br>2.8 <sup>h</sup> (CM4)<br>2.6 <sup>h</sup> (CMSi)<br>2.4 <sup>h</sup> (H <sub>2</sub> O) |
| SLD <sub>chains</sub> (10 <sup>-6</sup> Å <sup>-2</sup> ) <sup>c</sup> | -0.28 (h)<br>6.35 (d) | -0.22                                                                           | -0.28                                                                           | -0.28                                                                           | -0.28                                                                           | 0.250                            | -0.22 <sup>h</sup>                                                                                                              |
| SLD <sub>total</sub> (10 <sup>-6</sup> Å <sup>-2</sup> )               |                       |                                                                                 |                                                                                 |                                                                                 |                                                                                 |                                  | 0.5                                                                                                                             |
| SLD <sub>protein</sub> (10 <sup>-6</sup> Å <sup>-2</sup> )             | D <sub>2</sub> O      | CM4                                                                             | CMSi                                                                            | H <sub>2</sub> O                                                                | M <sub>w</sub> (g mol <sup>-1</sup> ) <sup>g</sup>                              | V <sub>m</sub> (Å <sup>3</sup> ) |                                                                                                                                 |
| <b>HsΔ29DHODH</b>                                                      | 3.0                   | 2.6                                                                             | 2.2                                                                             | 1.8                                                                             | 40 263                                                                          | 49 165                           |                                                                                                                                 |
| <b>EcDHODH</b>                                                         | 3.0                   | 2.6                                                                             | 2.2                                                                             | 1.8                                                                             | 36 775                                                                          | 45 576                           |                                                                                                                                 |

<sup>a</sup> Volume of the lipid headgroups, including the carbonyl groups and first carbon.<sup>b</sup> Volume of the lipid chains.<sup>c</sup> Neutron scattering length density of the lipid headgroups and chains, calculated from the component volumes [61-65] and isotopic composition (d = d<sub>63</sub>-POPC).<sup>d</sup> Volume corresponding to Coenzyme Q<sub>0</sub> (2,3-dimethoxy-5-methyl-1,4-benzoquinone).<sup>e</sup> Volume calculated by adding the volumes of 10 isoprene units.<sup>f</sup> Protein scattering length density, calculated on the basis of amino acid sequence, amino acid volumes [66] and proton exchange with deuterated solvents.<sup>g</sup> Protein molecular weight.<sup>h</sup> Calculated from the molar composition of the complex lipid mixture.**Table S3.** Thermal stability data determined by nanoDSF. The melting temperature (mean ± SD) calculated from 3 independent measurements is reported. The buffer in the different contrasts was 10 mM Tris-HCl pH (pD) 7.4, 100 mM NaCl.

| Contrast              | T <sub>m</sub> (°C) |                |
|-----------------------|---------------------|----------------|
|                       | <i>HsΔ29DHODH</i>   | <i>EcDHODH</i> |
| <b>H<sub>2</sub>O</b> | 51.5 ± 0.1          | 54.5 ± 2.1     |
| <b>CMSi</b>           | 52.6 ± 0.2          | 55.5 ± 0.7     |
| <b>CM4</b>            | 52.8 ± 0.1          | 54.7 ± 1.9     |
| <b>D<sub>2</sub>O</b> | 52.7 ± 0.3          | 56.2 ± 1.0     |

**Table S4.** Parameters corresponding to the best fits to the data from d<sub>63</sub>-POPC/TOCL membranes before and after addition of HsΔ29DHODH, and after rinse, as displayed in Figure 2.  $\tau$  = layer thickness,  $\rho$  = coherent neutron scattering length density (SLD) of the layers without the solvent contribution,  $\phi$  = solvent volume fraction,  $\sigma$  =  $\sigma$ -value of a gaussian interfacial roughness between each layer and the previous layer. Fitting uncertainties are given for the most sensitive contrast.

| <b>Lipid Bilayer</b>           |            |                                                                                       |                     |              |                        |
|--------------------------------|------------|---------------------------------------------------------------------------------------|---------------------|--------------|------------------------|
| Layer                          | $\tau$ (Å) | $\rho$ ( $10^{-6}$ Å <sup>-2</sup> ) in<br>D <sub>2</sub> O/CM4/CMSi/H <sub>2</sub> O | $\phi$ (vol%)       | $\sigma$ (Å) | vol% TOCL <sup>a</sup> |
| Inner lipid heads              | 11 ± 1     | 2.0 ± 0.2                                                                             | 54 ± 5              | 3 ± 1        | 11 ± 2                 |
| Inner lipid chains             | 16 ± 1     | 5.4 ± 0.1                                                                             | 19 ± 3              | 4 ± 1        | 14 ± 2                 |
| Outer lipid chains             | 16 ± 1     | 4.6 ± 0.1                                                                             | 19 ± 3              | 2 ± 1        | 27 ± 2                 |
| Outer lipid heads              | 9 ± 1      | 2.1 ± 0.2                                                                             | 51 ± 5              | 7 ± 1        | 23 ± 2                 |
| <b>Lipid Bilayer + Protein</b> |            |                                                                                       |                     |              |                        |
| Layer                          | $\tau$ (Å) | $\rho$ ( $10^{-6}$ Å <sup>-2</sup> ) in<br>D <sub>2</sub> O/CM4/CMSi/H <sub>2</sub> O | $\phi$ (vol%)       | $\sigma$ (Å) | vol% DHODH             |
| Inner lipid heads              | 10 ± 1     | 2.0 ± 0.2                                                                             | 54 ± 5              | 3 ± 1        |                        |
| Inner lipid chains             | 15 ± 1     | 5.4 ± 0.1                                                                             | 21 ± 3 <sup>b</sup> | 4 ± 1        |                        |
| Outer lipid chains + protein   | 15 ± 1     | 4.0/3.8/3.7/3.5 ± 0.1                                                                 | 21 ± 3 <sup>b</sup> | 4 ± 1        | 37 ± 8 <sup>c</sup>    |
| Outer lipid heads + protein    | 8 ± 1      | 2.5/2.3/2.1/1.9 ± 0.5                                                                 | 44 ± 5              | 4 ± 1        | 51 ± 22 <sup>c</sup>   |
| Protein layer 1                | 43 ± 5     | 3.0/2.6/2.2/1.8 ± 0.2                                                                 | 84 ± 3 <sup>d</sup> | 5 ± 1        | 16 ± 2 <sup>e</sup>    |
| Protein layer 2                | 60 ± 15    | 3.0/2.6/2.2/1.8 ± 0.2                                                                 | 96 ± 3 <sup>f</sup> | 8 ± 1        | 4 ± 2 <sup>e</sup>     |
| <b>After Rinse</b>             |            |                                                                                       |                     |              |                        |
| Layer                          | $\tau$ (Å) | $\rho$ ( $10^{-6}$ Å <sup>-2</sup> ) in<br>D <sub>2</sub> O/CM4/CMSi/H <sub>2</sub> O | $\phi$ (vol%)       | $\sigma$ (Å) | vol% DHODH             |
| Inner lipid heads              | 10 ± 1     | 2.0 ± 0.2                                                                             | 54 ± 5              | 3 ± 1        |                        |
| Inner lipid chains             | 15 ± 1     | 5.4 ± 0.1                                                                             | 21 ± 3 <sup>g</sup> | 5 ± 1        |                        |
| Outer lipid chains + protein   | 15 ± 1     | 4.0/3.8/3.7/3.5 ± 0.1                                                                 | 21 ± 3 <sup>g</sup> | 3 ± 1        | 37 ± 8 <sup>c</sup>    |
| Outer lipid heads + protein    | 8 ± 1      | 2.5/2.3/2.1/1.9 ± 0.5                                                                 | 46 ± 5              | 5 ± 1        | 51 ± 22 <sup>c</sup>   |
| Protein layer 1                | 46 ± 5     | 3.0/2.6/2.2/1.8 ± 0.2                                                                 | 88 ± 3 <sup>h</sup> | 6 ± 1        | 12 ± 2 <sup>e</sup>    |
| Protein layer 2                | 85 ± 15    | 3.0/2.6/2.2/1.8 ± 0.2                                                                 | 98 ± 3 <sup>i</sup> | 8 ± 1        | 2 ± 2 <sup>e</sup>     |

<sup>a</sup> Relative to d<sub>63</sub>-POPC.

<sup>b</sup> 21 ± 3% in D<sub>2</sub>O, CM4 and CMSi, 13 ± 3% in H<sub>2</sub>O.

<sup>c</sup> Relative to the lipids.

<sup>d</sup> 84 ± 3% in D<sub>2</sub>O, 90 ± 3% in CM4, 84 ± 50% in CMSi and 93 ± 3% in H<sub>2</sub>O

<sup>e</sup> Relative to water.

<sup>f</sup> 96 ± 3% in D<sub>2</sub>O and CM4, 96 ± 50% in CMSi, 100% ± 3% in H<sub>2</sub>O.

<sup>g</sup> 21 ± 3% in D<sub>2</sub>O, CM4 and CMSi, 16 ± 3% in H<sub>2</sub>O.

<sup>h</sup> 88 ± 3% in D<sub>2</sub>O, 94 ± 3% in CM4, 85 ± 50% in CMSi, 97 ± 3% in H<sub>2</sub>O.

<sup>i</sup> 98 ± 3% in D<sub>2</sub>O and CM4, 98 ± 50% in CMSi, 100 ± 3% in H<sub>2</sub>O.

**Table S5.** Parameters corresponding to the best fits to the data from the POPC/TOCL bilayer before and after addition of *Hs*Δ29DHODH, and after rinse, as displayed in Fig. S1. Fitting uncertainties are given for the most sensitive contrast.

| Lipid Bilayer      |             |                                                                          |               |              |               |
|--------------------|-------------|--------------------------------------------------------------------------|---------------|--------------|---------------|
| Layer              | $\tau$ (Å)  | $\rho$ ( $10^{-6} \text{ Å}^{-2}$ )                                      | $\phi$ (vol%) | $\sigma$ (Å) | vol% DHODH    |
| Inner lipid heads  | $8 \pm 1$   | $2.0 \pm 0.2$                                                            | $35 \pm 5$    | $3 \pm 1$    |               |
| Inner lipid chains | $16 \pm 1$  | $-0.27 \pm 0.1$                                                          | $9 \pm 2$     | $3 \pm 1$    |               |
| Outer lipid chains | $16 \pm 1$  | $-0.27 \pm 0.1$                                                          | $9 \pm 2$     | $3 \pm 1$    |               |
| Outer lipid heads  | $8 \pm 1$   | $2.1 \pm 0.2$                                                            | $47 \pm 5$    | $6 \pm 1$    |               |
| Bilayer + Protein  |             |                                                                          |               |              |               |
| Layer              | $\tau$ (Å)  | $\rho$ ( $10^{-6} \text{ Å}^{-2}$ ) in D <sub>2</sub> O/H <sub>2</sub> O | $\phi$ (vol%) | $\sigma$ (Å) | vol% DHODH    |
| Inner lipid heads  | $8 \pm 1$   | $2.0 \pm 0.2$                                                            | $35 \pm 7$    | $4 \pm 1$    |               |
| Inner lipid chains | $16 \pm 1$  | $-0.27 \pm 0.1$                                                          | $9 \pm 2$     | $4 \pm 1$    |               |
| Outer lipid chains | $16 \pm 1$  | $-0.27 \pm 0.1$                                                          | $9 \pm 2$     | $3 \pm 1$    |               |
| Outer lipid heads  | $8 \pm 1$   | $2.1 \pm 0.2$                                                            | $45 \pm 5$    | $5 \pm 1$    | $20 \pm 22^a$ |
| Protein layer 1    | $46 \pm 5$  | $3.0/1.8 \pm 0.2$                                                        | $93 \pm 3^b$  | $5 \pm 1$    | $7 \pm 3^c$   |
| Protein layer 2    | $75 \pm 15$ | $3.0/1.8 \pm 0.2$                                                        | $98 \pm 3^d$  | $10 \pm 1$   | $2 \pm 3^c$   |
| After Rinse        |             |                                                                          |               |              |               |
| Layer              | $\tau$ (Å)  | $\rho$ ( $10^{-6} \text{ Å}^{-2}$ ) in D <sub>2</sub> O/H <sub>2</sub> O | $\phi$ (vol%) | $\sigma$ (Å) | vol% DHODH    |
| Inner lipid heads  | $8 \pm 1$   | $2.0 \pm 0.2$                                                            | $35 \pm 5$    | $4 \pm 1$    |               |
| Inner lipid chains | $16 \pm 1$  | $-0.27 \pm 0.1$                                                          | $9 \pm 2$     | $4 \pm 1$    |               |
| Outer lipid chains | $16 \pm 1$  | $-0.27 \pm 0.1$                                                          | $9 \pm 2$     | $3 \pm 1$    |               |
| Outer lipid heads  | $8 \pm 1$   | $2.1 \pm 0.2$                                                            | $46 \pm 5$    | $5 \pm 1$    | $20 \pm 22^a$ |
| Protein layer 1    | $40 \pm 5$  | $3.0/1.8 \pm 0.2$                                                        | $96 \pm 3^e$  | $5 \pm 1$    | $4 \pm 3^c$   |

<sup>a</sup> Relative to the lipids.

<sup>b</sup>  $93 \pm 4\%$  in D<sub>2</sub>O and  $92 \pm 3\%$  in H<sub>2</sub>O.

<sup>c</sup> Relative to water.

<sup>d</sup>  $98 \pm 4\%$  in D<sub>2</sub>O and  $98 \pm 3\%$  in H<sub>2</sub>O.

<sup>e</sup>  $96 \pm 4\%$  in D<sub>2</sub>O and  $96 \pm 3\%$  in H<sub>2</sub>O.

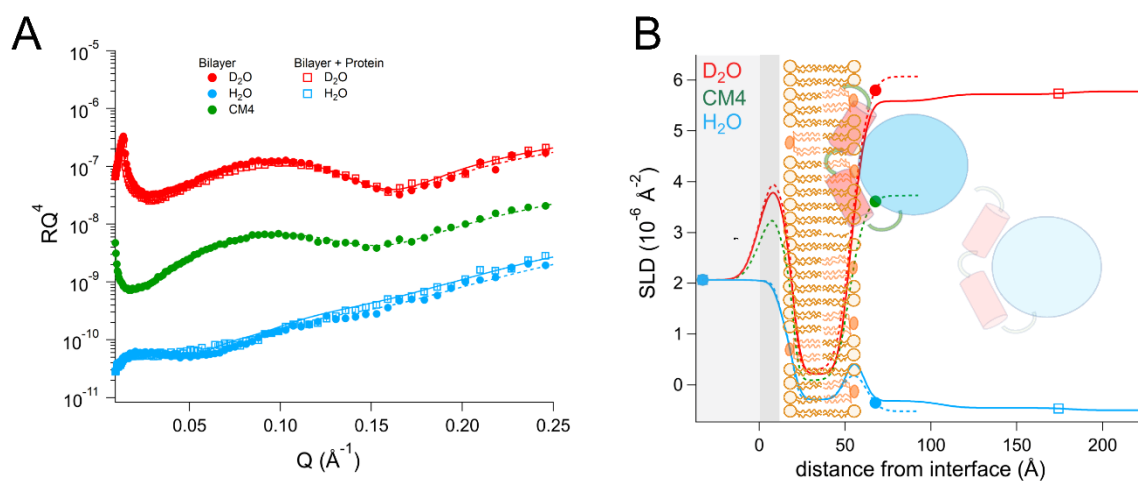

**Figure S1.** (A) Reflectivity curves (data from INTER, ISIS) and (B) SLD profile for POPC/TOCL bilayers before and after addition of *Hs*Δ29DHODH with a schematic representation of the model structure. POPC molecules are shown in brown (hollow heads, two tails). TOCL molecules are depicted in orange (filled heads, four tails). The  $\alpha 1$ - $\alpha 2$  microdomain of the protein is shown in red and the catalytic domain is depicted in blue.

**Table S6.** Parameters corresponding to the best fits to the data from POPC/TOCL membranes before and after addition of EcDHODH, and after rinse, as displayed in Figure 3. Fitting uncertainties are given for the most sensitive contrast.

| <b>Lipid Bilayer</b>           |            |                                                                                       |                     |              |                        |
|--------------------------------|------------|---------------------------------------------------------------------------------------|---------------------|--------------|------------------------|
| Layer                          | $\tau$ (Å) | $\rho$ ( $10^{-6}$ Å <sup>-2</sup> )                                                  | $\phi$ (vol%)       | $\sigma$ (Å) | vol% TOCL <sup>a</sup> |
| Inner lipid heads              | 8 ± 1      | 2.0 ± 0.2                                                                             | 43 ± 8              | 3 ± 1        | 11 ± 2                 |
| Inner lipid chains             | 15 ± 1     | -0.27 ± 0.1                                                                           | 10 ± 2              | 3 ± 1        | 14 ± 2                 |
| Outer lipid chains             | 15 ± 1     | -0.27 ± 0.1                                                                           | 10 ± 2              | 3 ± 1        | 27 ± 2                 |
| Outer lipid heads              | 9 ± 1      | 2.1 ± 0.2                                                                             | 59 ± 8              | 6 ± 1        | 23 ± 2                 |
| <b>Lipid Bilayer + Protein</b> |            |                                                                                       |                     |              |                        |
| Layer                          | $\tau$ (Å) | $\rho$ ( $10^{-6}$ Å <sup>-2</sup> ) in<br>D <sub>2</sub> O/CM4/CMSi/H <sub>2</sub> O | $\phi$ (vol%)       | $\sigma$ (Å) | vol%<br>DHODH          |
| Inner lipid heads              | 9 ± 1      | 2.0 ± 0.2                                                                             | 50 ± 8              | 4 ± 1        |                        |
| Inner lipid chains             | 15 ± 1     | -0.27 ± 0.1                                                                           | 19 ± 2              | 4 ± 1        |                        |
| Outer chains + protein         | 15 ± 1     | 0.0025/-0.035/-0.063/0.11 ± 0.1                                                       | 19 ± 2              | 5 ± 1        | 8 ± 3 <sup>b</sup>     |
| Outer heads + protein          | 9 ± 1      | 2.1 ± 0.5                                                                             | 50 ± 5              | 3 ± 1        | 7 ± 18 <sup>b</sup>    |
| Protein layer 1                | 46 ± 5     | 3.0/2.6/2.2/1.8 ± 0.2                                                                 | 72 ± 2 <sup>c</sup> | 3 ± 1        | 28 ± 3 <sup>d</sup>    |
| Protein layer 2                | 55 ± 15    | 3.0/2.6/2.2/1.8 ± 0.2                                                                 | 84 ± 3 <sup>e</sup> | 10 ± 1       | 16 ± 3 <sup>d</sup>    |
| Protein layer 3                | 55 ± 15    | 3.0/2.6/2.2/1.8 ± 0.2                                                                 | 92 ± 3 <sup>f</sup> | 12 ± 1       | 8 ± 3 <sup>d</sup>     |
| Protein layer 4                | 55 ± 15    | 3.0/2.6/2.2/1.8 ± 0.2                                                                 | 96 ± 3 <sup>g</sup> | 12 ± 1       | 4 ± 3 <sup>d</sup>     |
| <b>After rinse</b>             |            |                                                                                       |                     |              |                        |
| Layer                          | $\tau$ (Å) | $\rho$ ( $10^{-6}$ Å <sup>-2</sup> ) in<br>D <sub>2</sub> O/CM4/CMSi/H <sub>2</sub> O | $\phi$ (vol%)       | $\sigma$ (Å) | vol%<br>DHODH          |
| Inner lipid heads              | 9 ± 1      | 2.0 ± 0.2                                                                             | 50 ± 8              | 4 ± 1        |                        |
| Inner lipid chains             | 15 ± 1     | -0.27 ± 0.1                                                                           | 21 ± 2              | 4 ± 1        |                        |
| Outer chains + protein         | 15 ± 1     | 0.0025/-0.035/-0.063/0.11 ± 0.1                                                       | 21 ± 2              | 4 ± 1        | 8 ± 3 <sup>b</sup>     |
| Outer heads + protein          | 10 ± 1     | 2.1 ± 0.5                                                                             | 58 ± 5              | 4 ± 1        | 7 ± 18 <sup>b</sup>    |
| Protein layer 1                | 46 ± 5     | 3.0/2.6/2.2/1.8 ± 0.2                                                                 | 75 ± 2 <sup>h</sup> | 4 ± 1        | 25 ± 3 <sup>d</sup>    |
| Protein layer 2                | 55 ± 15    | 3.0/2.6/2.2/1.8 ± 0.2                                                                 | 84 ± 3 <sup>i</sup> | 8 ± 1        | 16 ± 3 <sup>d</sup>    |
| Protein layer 3                | 55 ± 15    | 3.0/2.6/2.2/1.8 ± 0.2                                                                 | 91 ± 3 <sup>j</sup> | 12 ± 1       | 9 ± 3 <sup>d</sup>     |
| Protein layer 4                | 55 ± 15    | 3.0/2.6/2.2/1.8 ± 0.2                                                                 | 96 ± 3 <sup>k</sup> | 12 ± 1       | 4 ± 3 <sup>d</sup>     |

<sup>a</sup>Relative to POPC.

<sup>b</sup>Relative to the lipids.

<sup>c</sup>72 ± 2% in D<sub>2</sub>O, 77 ± 2% in CM4, 77 ± 50% in CMSi and 81 ± 2% in H<sub>2</sub>O.

<sup>d</sup>Relative to water.

<sup>e</sup>84 ± 2% in D<sub>2</sub>O, 87 ± 2% in CM4, 90 ± 50% in CMSi and 94 ± 2% in H<sub>2</sub>O.

<sup>f</sup>92 ± 2% in D<sub>2</sub>O, 92 ± 2% in CM4, 92 ± 50% in CMSi and 97 ± 2% in H<sub>2</sub>O.

<sup>g</sup>96 ± 2% in D<sub>2</sub>O, 97 ± 2% in CM4, 97 ± 50% in CMSi and 100 ± 2% in H<sub>2</sub>O.

<sup>h</sup>75 ± 2% in D<sub>2</sub>O, 83 ± 2% in CM4, 85 ± 50% in CMSi and 89 ± 2% in H<sub>2</sub>O.

<sup>i</sup>84 ± 2% in D<sub>2</sub>O, 87 ± 2% in CM4, 93 ± 50% in CMSi and 94 ± 2% in H<sub>2</sub>O.

<sup>j</sup>91 ± 2% in D<sub>2</sub>O, 92 ± 2% in CM4, 92 ± 50% in CMSi and 97 ± 2% in H<sub>2</sub>O.

<sup>k</sup>96 ± 2% in D<sub>2</sub>O, 96 ± 2% in CM4, 97 ± 50% in CMSi and 100 ± 2% in H<sub>2</sub>O.

**Table S7.** Parameters corresponding to the best fits to the data from d<sub>63</sub>-POPC/TOCL/Q<sub>10</sub> membranes before and after addition of *Hs*Δ29DHODH, and after buffer rinse, as displayed in Figure 4. Fitting uncertainties are given for the most sensitive contrast.

| <b>Lipid Bilayer</b>     |            |                                                                                       |                     |              |                                      |
|--------------------------|------------|---------------------------------------------------------------------------------------|---------------------|--------------|--------------------------------------|
| Layer                    | $\tau$ (Å) | $\rho$ ( $10^{-6}$ Å <sup>-2</sup> )                                                  | $\phi$ (vol%)       | $\sigma$ (Å) | vol%                                 |
| Inner lipid heads        | 10 ± 1     | 2.0 ± 0.2                                                                             | 58 ± 5              | 3 ± 1        | 11 ± 3% TOCL <sup>a</sup>            |
| Inner lipid chains       | 13 ± 1     | 5.4 ± 0.2                                                                             | 9 ± 2               | 2 ± 1        | 14 ± 3% TOCL <sup>a</sup>            |
| Ubiquinone + chains      | 4 ± 1      | 2.7 ± 0.2                                                                             | 9 ± 2               | 1 ± 1        | 51 ± 5% Q <sub>10</sub> <sup>b</sup> |
| Outer lipid chains       | 13 ± 1     | 4.4 ± 0.2                                                                             | 9 ± 2               | 4 ± 1        | 29 ± 3% TOCL <sup>a</sup>            |
| Outer lipid heads        | 9 ± 1      | 2.1 ± 0.2                                                                             | 47 ± 5              | 5 ± 1        | 23 ± 3% TOCL <sup>a</sup>            |
| <b>Bilayer + Protein</b> |            |                                                                                       |                     |              |                                      |
| Layer                    | $\tau$ (Å) | $\rho$ ( $10^{-6}$ Å <sup>-2</sup> ) in<br>D <sub>2</sub> O/CM4/CMSi/H <sub>2</sub> O | $\phi$ (vol%)       | $\sigma$ (Å) | vol%                                 |
| Inner lipid heads        | 11 ± 1     | 2.0 ± 0.2                                                                             | 48 ± 5              | 3 ± 1        |                                      |
| Inner lipid chains       | 13 ± 1     | 5.4 ± 0.2 <sup>c</sup>                                                                | 11 ± 2 <sup>d</sup> | 3 ± 1        |                                      |
| Ubiquinone + chains      | 4 ± 1      | 2.7 ± 0.2                                                                             | 11 ± 2 <sup>d</sup> | 2 ± 1        | 51 ± 5% Q <sub>10</sub> <sup>b</sup> |
| Outer chains + protein   | 13 ± 1     | 4.0/3.9/3.8/4.0 ± 0.2                                                                 | 11 ± 2 <sup>d</sup> | 2 ± 1        | 29 ± 14% DHODH <sup>b</sup>          |
| Outer heads + protein    | 8 ± 1      | 2.5/2.3/2.1/2.0 ± 0.5                                                                 | 40 ± 5              | 3 ± 1        | 42 ± 14% DHODH <sup>b</sup>          |
| Protein Layer 1          | 36 ± 5     | 3.0/2.6/2.2/1.8 ± 0.2                                                                 | 70 ± 2 <sup>e</sup> | 4 ± 1        | 30 ± 2% DHODH <sup>f</sup>           |
| Protein Layer 2          | 49 ± 15    | 3.0/2.6/2.2/1.8 ± 0.2                                                                 | 92 ± 2 <sup>g</sup> | 5 ± 1        | 8 ± 2% DHODH <sup>f</sup>            |
| Protein Layer 3          | 62 ± 15    | 3.0/2.6/2.2/1.8 ± 0.2                                                                 | 94 ± 2 <sup>h</sup> | 10 ± 1       | 6 ± 2% DHODH <sup>f</sup>            |
| <b>After Rinse</b>       |            |                                                                                       |                     |              |                                      |
| Layer                    | $\tau$ (Å) | $\rho$ ( $10^{-6}$ Å <sup>-2</sup> ) in<br>D <sub>2</sub> O/CM4/CMSi/H <sub>2</sub> O | $\phi$ (vol%)       | $\sigma$ (Å) | vol%                                 |
| Inner lipid heads        | 10 ± 1     | 2.0 ± 0.2                                                                             | 55 ± 5              | 3 ± 1        |                                      |
| Inner lipid chains       | 12 ± 1     | 5.3 ± 0.2 <sup>c</sup>                                                                | 13 ± 2 <sup>d</sup> | 3 ± 1        |                                      |
| Ubiquinone + chains      | 4 ± 1      | 2.7 ± 0.2                                                                             | 13 ± 2 <sup>d</sup> | 2 ± 1        | 51 ± 5% Q <sub>10</sub> <sup>b</sup> |
| Outer chains + protein   | 12 ± 1     | 3.7/3.5/3.3/4.0 ± 0.2                                                                 | 13 ± 2 <sup>d</sup> | 4 ± 1        | 50 ± 14% DHODH <sup>b</sup>          |
| Outer heads + protein    | 8 ± 1      | 2.45/2.3/2.1/2.0 ± 0.5                                                                | 51 ± 5              | 4 ± 1        | 38 ± 14% DHODH <sup>b</sup>          |
| Protein Layer 1          | 38 ± 5     | 3.0/2.6/2.2/1.8 ± 0.2                                                                 | 80 ± 2 <sup>i</sup> | 5 ± 1        | 20 ± 2% DHODH <sup>f</sup>           |
| Protein Layer 2          | 55 ± 15    | 3.0/2.6/2.2/1.8 ± 0.2                                                                 | 96 ± 2 <sup>j</sup> | 10 ± 1       | 4 ± 2% DHODH <sup>f</sup>            |
| Protein Layer 3          | 55 ± 15    | 3.0/2.6/2.2/1.8 ± 0.2                                                                 | 95 ± 2 <sup>k</sup> | 10 ± 1       | 5 ± 2% DHODH <sup>f</sup>            |

<sup>a</sup> Relative to POPC.

<sup>b</sup> Relative to the lipids.

<sup>c</sup>  $5.0 \pm 0.2 \times 10^{-6}$  Å<sup>-2</sup> in H<sub>2</sub>O.

<sup>d</sup>  $0 \pm 2$  vol% in H<sub>2</sub>O.

<sup>e</sup>  $70 \pm 2\%$  in D<sub>2</sub>O,  $76 \pm 2\%$  in CM4,  $78 \pm 20\%$  in CMSi and  $78 \pm 2\%$  in H<sub>2</sub>O.

<sup>f</sup> Relative to water.

<sup>g</sup>  $92 \pm 2\%$  in D<sub>2</sub>O,  $95 \pm 2\%$  in CM4,  $95 \pm 20\%$  in CMSi and  $96 \pm 2\%$  in H<sub>2</sub>O.

<sup>h</sup>  $94 \pm 2\%$  in D<sub>2</sub>O,  $93 \pm 2\%$  in CM4,  $90 \pm 20\%$  in CMSi and  $86 \pm 2\%$  in H<sub>2</sub>O.

<sup>i</sup>  $80 \pm 2\%$  in D<sub>2</sub>O,  $87 \pm 2\%$  in CM4,  $88 \pm 20\%$  in CMSi and  $87 \pm 2\%$  in H<sub>2</sub>O.

<sup>j</sup>  $96 \pm 2\%$  in D<sub>2</sub>O,  $96 \pm 2\%$  in CM4,  $96 \pm 20\%$  in CMSi and  $97 \pm 2\%$  in H<sub>2</sub>O.

<sup>k</sup>  $95 \pm 2\%$  in D<sub>2</sub>O,  $96 \pm 2\%$  in CM4,  $93 \pm 20\%$  in CMSi and  $92 \pm 2\%$  in H<sub>2</sub>O.

**Table S8.** Parameters corresponding to the best fits to the data from POPC/TOCL/Q<sub>10</sub> bilayers before and after addition of *Hs*Δ29DHODH, and after rinse, as displayed in Figure S2. Fitting uncertainties are given for the most sensitive contrast.

| Lipid Bilayer          |              |                                                                          |               |              |                                            |
|------------------------|--------------|--------------------------------------------------------------------------|---------------|--------------|--------------------------------------------|
| Layer                  | $\tau$ (Å)   | $\rho$ ( $10^{-6} \text{ Å}^{-2}$ )                                      | $\phi$ (vol%) | $\sigma$ (Å) | vol%                                       |
| Inner lipid heads      | $8 \pm 1$    | $2.0 \pm 0.1$                                                            | $45 \pm 8$    | $4 \pm 1$    | $51 \pm 13\% \text{ Q}_{10}^a$             |
| Inner lipid chains     | $13.5 \pm 1$ | $-0.27 \pm 0.05$                                                         | $5 \pm 2$     | $4 \pm 1$    |                                            |
| Ubiquinone + Chains    | $4 \pm 1$    | $0.12 \pm 0.1$                                                           | $5 \pm 2$     | $2 \pm 1$    |                                            |
| Outer lipid chains     | $13.5 \pm 1$ | $-0.27 \pm 0.05$                                                         | $5 \pm 2$     | $3 \pm 1$    |                                            |
| Outer lipid heads      | $9 \pm 1$    | $2.1 \pm 0.1$                                                            | $52 \pm 8$    | $4 \pm 1$    |                                            |
| Bilayer + Protein      |              |                                                                          |               |              |                                            |
| Layer                  | $\tau$ (Å)   | $\rho$ ( $10^{-6} \text{ Å}^{-2}$ ) in D <sub>2</sub> O/H <sub>2</sub> O | $\phi$ (vol%) | $\sigma$ (Å) | vol%                                       |
| Inner lipid heads      | $8 \pm 1$    | $2.0 \pm 0.1$                                                            | $45 \pm 8$    | $4 \pm 1$    | $51 \pm 13 \text{ vol}\% \text{ Q}_{10}^a$ |
| Inner lipid chains     | $13 \pm 1$   | $-0.27 \pm 0.05$                                                         | $13 \pm 2$    | $4 \pm 1$    |                                            |
| Ubiquinone + chains    | $4 \pm 1$    | $0.12 \pm 0.1$                                                           | $13 \pm 2$    | $1 \pm 1$    |                                            |
| Outer chains + protein | $13 \pm 1$   | $-0.17 \pm 0.1$                                                          | $13 \pm 2$    | $3 \pm 1$    | $3 \pm 3 \text{ vol}\% \text{ DHODH}^a$    |
| Outer heads + protein  | $8 \pm 1$    | $2.3/2.1 \pm 0.2$                                                        | $45 \pm 5$    | $5 \pm 1$    | $20 \pm 22\% \text{ DHODH}^a$              |
| Protein layer 1        | $38 \pm 5$   | $3.0/1.8 \pm 0.2$                                                        | $78 \pm 2^b$  | $5 \pm 1$    | $22 \pm 2\% \text{ DHODH}^c$               |
| Protein layer 2        | $50 \pm 15$  | $3.0/1.8 \pm 0.2$                                                        | $89 \pm 2^d$  | $5 \pm 1$    | $11 \pm 2\% \text{ DHODH}^c$               |
| Protein layer 3        | $50 \pm 15$  | $3.0/1.8 \pm 0.2$                                                        | $88 \pm 2^e$  | $10 \pm 1$   | $12 \pm 2\% \text{ DHODH}^c$               |
| After Rinse            |              |                                                                          |               |              |                                            |
| Layer                  | $\tau$ (Å)   | $\rho$ ( $10^{-6} \text{ Å}^{-2}$ ) in D <sub>2</sub> O/H <sub>2</sub> O | $\phi$ (vol%) | $\sigma$ (Å) | vol%                                       |
| Inner lipid heads      | $8 \pm 1$    | $2.0 \pm 0.1$                                                            | $45 \pm 8$    | $4 \pm 1$    | $51 \pm 13 \text{ vol}\% \text{ Q}_{10}^a$ |
| Inner lipid chains     | $13 \pm 1$   | $-0.27 \pm 0.05$                                                         | $14 \pm 2$    | $4 \pm 1$    |                                            |
| Ubiquinone + chains    | $4 \pm 1$    | $0.12 \pm 0.1$                                                           | $14 \pm 2$    | $2 \pm 1$    |                                            |
| Outer chains + protein | $13 \pm 1$   | $-0.17 \pm 0.1$                                                          | $14 \pm 2$    | $3 \pm 1$    | $3 \pm 3 \text{ vol}\% \text{ DHODH}^a$    |
| Outer heads + protein  | $8 \pm 1$    | $2.3/2.1 \pm 0.2$                                                        | $48 \pm 5$    | $5 \pm 1$    | $20 \pm 22\% \text{ DHODH}^a$              |
| Protein layer 1        | $38 \pm 5$   | $3.0/1.8 \pm 0.2$                                                        | $88 \pm 2^f$  | $5 \pm 1$    | $12 \pm 2\% \text{ DHODH}^c$               |
| Protein layer 2        | $50 \pm 15$  | $3.0/1.8 \pm 0.2$                                                        | $92 \pm 2^g$  | $5 \pm 1$    | $8 \pm 2\% \text{ DHODH}^c$                |
| Protein layer 3        | $50 \pm 15$  | $3.0/1.8 \pm 0.2$                                                        | $89 \pm 2^h$  | $10 \pm 1$   | $11 \pm 2\% \text{ DHODH}^c$               |

<sup>a</sup> Relative to the lipids.

<sup>b</sup>  $78 \pm 2\%$  in D<sub>2</sub>O,  $88 \pm 2\%$  in H<sub>2</sub>O.

<sup>c</sup> Relative to water.

<sup>d</sup>  $89 \pm 2\%$  in D<sub>2</sub>O,  $94 \pm 2\%$  in H<sub>2</sub>O.

<sup>e</sup>  $88 \pm 2\%$  in D<sub>2</sub>O,  $97 \pm 2\%$  in H<sub>2</sub>O.

<sup>f</sup>  $88 \pm 2\%$  in D<sub>2</sub>O,  $90 \pm 2\%$  in H<sub>2</sub>O.

<sup>g</sup>  $92 \pm 2\%$  in D<sub>2</sub>O,  $96 \pm 2\%$  in H<sub>2</sub>O.

<sup>h</sup>  $89 \pm 2\%$  in D<sub>2</sub>O,  $98 \pm 2\%$  in H<sub>2</sub>O.

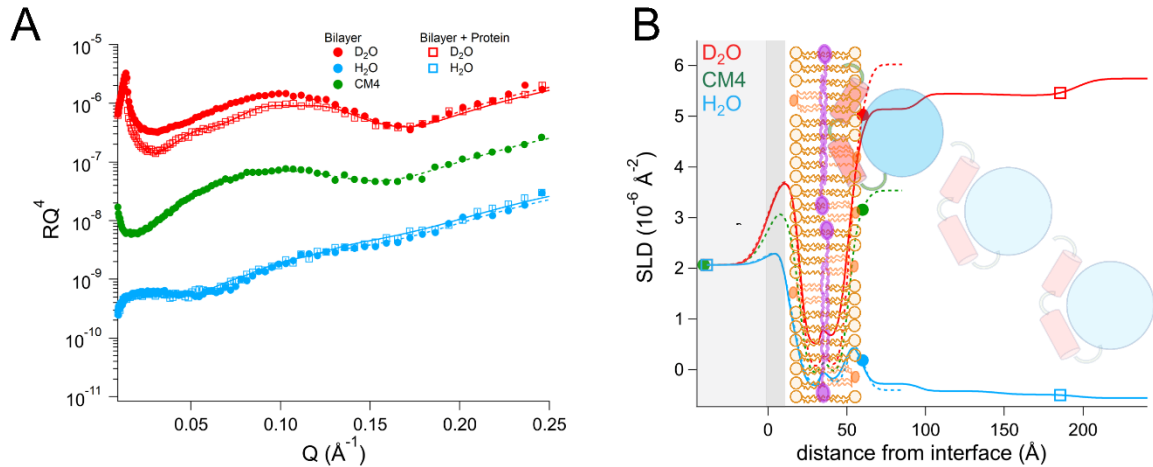

**Figure S2.** (A) Reflectivity curves (data from INTER, ISIS) and (B) SLD profile for POPC/TOCL/Q<sub>10</sub> bilayers before and after addition of *Hs*Δ29DHODH with a schematic representation of the model structure. POPC molecules are shown in brown (hollow heads, two tails). TOCL molecules are depicted in orange (filled heads, four tails). The  $\alpha 1$ - $\alpha 2$  microdomain of the protein is shown in red and the catalytic domain is depicted in blue. Ubiquinone molecules are represented in purple (filled heads, long tails).

**Table S9.** Parameters corresponding to the best fits to the data from POPC/TOCL/Q<sub>10</sub> before and after addition of *Ec*DHODH, and after rinse, as displayed in Fig. 5. Fitting uncertainties are given for the most sensitive contrast.

| <b>Lipid Bilayer</b>     |            |                                                                                    |                     |              |                                       |
|--------------------------|------------|------------------------------------------------------------------------------------|---------------------|--------------|---------------------------------------|
| Layer                    | $\tau$ (Å) | $\rho$ ( $10^{-6}$ Å <sup>-2</sup> )                                               | $\phi$ (vol%)       | $\sigma$ (Å) | vol%                                  |
| Inner lipid heads        | 10 ± 1     | 2.0 ± 0.2                                                                          | 51 ± 8              | 3 ± 1        | 11 ± 3% TOCL <sup>a</sup>             |
| Inner lipid chains       | 14 ± 1     | -0.27 ± 0.1                                                                        | 2 ± 2               | 3 ± 1        | 14 ± 3% TOCL <sup>a</sup>             |
| Ubiquinone + chains      | 4 ± 1      | 0.12 ± 0.12                                                                        | 2 ± 2               | 1 ± 1        | 51 ± 16% Q <sub>10</sub> <sup>b</sup> |
| Outer lipid chains       | 14 ± 1     | -0.27 ± 0.1                                                                        | 2 ± 2               | 3 ± 1        | 29 ± 3% TOCL <sup>a</sup>             |
| Outer lipid heads        | 8 ± 1      | 2.1 ± 0.2                                                                          | 45 ± 10             | 4 ± 1        | 23 ± 3% TOCL <sup>a</sup>             |
| <b>Bilayer + Protein</b> |            |                                                                                    |                     |              |                                       |
| Layer                    | $\tau$ (Å) | $\rho$ ( $10^{-6}$ Å <sup>-2</sup> ) in D <sub>2</sub> O/CM4/CMSi/H <sub>2</sub> O | $\phi$ (vol%)       | $\sigma$ (Å) | vol%                                  |
| Inner lipid heads        | 10 ± 1     | 2.0 ± 0.2                                                                          | 56 ± 8              | 3 ± 1        | 11 ± 3% TOCL <sup>a</sup>             |
| Inner lipid chains       | 13 ± 1     | -0.27 ± 0.1                                                                        | 10 ± 2              | 2 ± 1        | 14 ± 3% TOCL <sup>a</sup>             |
| Ubiquinone + chains      | 4 ± 1      | 0.12 ± 0.12                                                                        | 10 ± 2              | 1 ± 1        | 51 ± 16% Q <sub>10</sub> <sup>b</sup> |
| Outer chains + protein   | 13 ± 1     | 0.057/0.017/-0.023/-0.063 ± 0.2                                                    | 10 ± 2              | 2 ± 1        | 10 ± 8% DHODH <sup>b</sup>            |
| Outer heads + protein    | 7 ± 1      | 2.3/2.2/2.1/2.1 ± 0.2                                                              | 50 ± 5              | 4 ± 1        | 21 ± 12% DHODH <sup>b</sup>           |
| Protein layer 1          | 39 ± 5     | 3.0/2.6/2.2/1.8 ± 0.2                                                              | 81 ± 3 <sup>c</sup> | 5 ± 1        | 19 ± 3% DHODH <sup>d</sup>            |
| Protein layer 2          | 73 ± 15    | 3.0/2.6/2.2/1.8 ± 0.2                                                              | 97 ± 3 <sup>e</sup> | 10 ± 1       | 3 ± 3% DHODH <sup>d</sup>             |
| <b>After Rinse</b>       |            |                                                                                    |                     |              |                                       |
| Layer                    | $\tau$ (Å) | $\rho$ ( $10^{-6}$ Å <sup>-2</sup> ) in D <sub>2</sub> O/CM4/CMSi/H <sub>2</sub> O | $\phi$ (vol%)       | $\sigma$ (Å) | vol%                                  |
| Inner lipid heads        | 10 ± 1     | 2.0 ± 0.2                                                                          | 57 ± 8              | 3 ± 1        | 11 ± 3% TOCL <sup>a</sup>             |
| Inner lipid chains       | 13 ± 1     | -0.27 ± 0.1                                                                        | 10 ± 2              | 2 ± 1        | 14 ± 3% TOCL <sup>a</sup>             |
| Ubiquinone + Chains      | 4 ± 1      | 0.12 ± 0.12                                                                        | 10 ± 2              | 1 ± 1        | 51 ± 16% Q <sub>10</sub> <sup>b</sup> |
| Outer chains + protein   | 13 ± 1     | 0.057/0.017/-0.023/-0.063 ± 0.2                                                    | 10 ± 2              | 2 ± 1        | 10 ± 8% DHODH <sup>b</sup>            |
| Outer heads + protein    | 7 ± 1      | 2.3/2.2/2.1/2.1 ± 0.2                                                              | 52 ± 5              | 3 ± 1        | 21 ± 12% DHODH <sup>b</sup>           |
| Protein layer 1          | 39 ± 5     | 3.0/2.6/2.2/1.8 ± 0.2                                                              | 81 ± 3 <sup>f</sup> | 4 ± 1        | 19 ± 3% DHODH <sup>d</sup>            |
| Protein layer 2          | 73 ± 15    | 3.0/2.6/2.2/1.8 ± 0.2                                                              | 97 ± 3 <sup>g</sup> | 8 ± 1        | 3 ± 3% DHODH <sup>d</sup>             |

\*An additional layer 46 Å thick and separated by a 40 Å thick water layer was found floating on top of the lipid bilayer in the first contrast measured (D<sub>2</sub>O). This is likely to be a floating lipid bilayer on top of the supported lipid bilayer.

<sup>a</sup> Relative to POPC.

<sup>b</sup> Relative to the lipids.

<sup>c</sup> 81 ± 3% in D<sub>2</sub>O, 81 ± 12% in CM4, 81 ± 50% in CMSi and 81 ± 2% in H<sub>2</sub>O.

<sup>d</sup> Relative to water.

<sup>e</sup> 97 ± 3% in D<sub>2</sub>O, 97 ± 12% in CM4, 97 ± 50% in CMSi and 97 ± 2% in H<sub>2</sub>O.

<sup>f</sup> 81 ± 4% in D<sub>2</sub>O, 81 ± 7% in CM4, 81 ± 50% in CMSi and 85 ± 3% in H<sub>2</sub>O.

<sup>g</sup> 97 ± 4% in D<sub>2</sub>O, 97 ± 7% in CM4, 97 ± 50% in CMSi and 97 ± 3% in H<sub>2</sub>O.



**Table S10.** Parameters corresponding to the best fits to the data from *Candida glabrata* membranes before and after addition of HsΔ29DHODH, and after rinse, as displayed in Figure 6. Fitting uncertainties are given for the most sensitive contrast.

| <b>Lipid Bilayer</b>     |             |                                                                                 |               |              |              |
|--------------------------|-------------|---------------------------------------------------------------------------------|---------------|--------------|--------------|
| Layer                    | $\tau$ (Å)  | $\rho$ ( $10^{-6}$ Å $^{-2}$ )                                                  | $\phi$ (vol%) | $\sigma$ (Å) |              |
| Inner lipid heads        | $9 \pm 1$   | $3.0/2.8/2.6/2.4 \pm 0.2$                                                       | $45 \pm 5$    | $4 \pm 1$    |              |
| Inner lipid chains       | $14 \pm 1$  | $-0.22 \pm 0.1$                                                                 | $2 \pm 2$     | $4 \pm 1$    |              |
| Outer lipid chains       | $14 \pm 1$  | $-0.22 \pm 0.1$                                                                 | $2 \pm 2$     | $3 \pm 1$    |              |
| Outer lipid heads        | $8 \pm 1$   | $3.0/2.8/2.6/2.4 \pm 0.2$                                                       | $42 \pm 5$    | $3 \pm 1$    |              |
| <b>Bilayer + Protein</b> |             |                                                                                 |               |              |              |
| Layer                    | $\tau$ (Å)  | $\rho$ ( $10^{-6}$ Å $^{-2}$ ) in<br>D <sub>2</sub> O/CM4/CMSi/H <sub>2</sub> O | $\phi$ (vol%) | $\sigma$ (Å) | vol% DHODH   |
| Inner lipid heads        | $9 \pm 1$   | $3.0/2.8/2.6/2.4 \pm 0.2$                                                       | $54 \pm 5$    | $4 \pm 1$    |              |
| Inner lipid chains       | $14 \pm 1$  | $-0.22 \pm 0.1$                                                                 | $15 \pm 2$    | $4 \pm 1$    |              |
| Outer chains + protein   | $14 \pm 1$  | $0.10/0.06/0.02/-0.02 \pm 0.1$                                                  | $15 \pm 2$    | $4 \pm 1$    | $10 \pm 5^a$ |
| Outer heads + protein    | $8 \pm 1$   | $3.0/2.8/2.5/2.3 \pm 0.2$                                                       | $50 \pm 5$    | $3 \pm 1$    | $18 \pm 8^a$ |
| Protein layer 1          | $35 \pm 5$  | $3.0/2.6/2.2/1.8 \pm 0.2$                                                       | $70 \pm 2^b$  | $3 \pm 1$    | $30 \pm 2^c$ |
| Protein layer 2          | $75 \pm 15$ | $3.0/2.6/2.2/1.8 \pm 0.2$                                                       | $84 \pm 2^d$  | $10 \pm 1$   | $16 \pm 2^c$ |
| Protein layer 3          | $60 \pm 15$ | $3.0/2.6/2.2/1.8 \pm 0.2$                                                       | $94 \pm 2^e$  | $10 \pm 1$   | $6 \pm 2^c$  |
| Protein layer 4          | $65 \pm 15$ | $3.0/2.6/2.2/1.8 \pm 0.2$                                                       | $94 \pm 2^f$  | $10 \pm 1$   | $6 \pm 2^c$  |
| Protein layer 5          | $65 \pm 15$ | $3.0/2.6/2.2/1.8 \pm 0.2$                                                       | $96 \pm 2^g$  | $10 \pm 1$   | $4 \pm 2^c$  |
| <b>After Rinse</b>       |             |                                                                                 |               |              |              |
| Layer                    | $\tau$ (Å)  | $\rho$ ( $10^{-6}$ Å $^{-2}$ ) in<br>D <sub>2</sub> O/CM4/CMSi/H <sub>2</sub> O | $\phi$ (vol%) | $\sigma$ (Å) | vol% DHODH   |
| Inner lipid heads        | $9 \pm 1$   | $3.0/2.8/2.6/2.4 \pm 0.2$                                                       | $59 \pm 3$    | $4 \pm 1$    |              |
| Inner lipid chains       | $14 \pm 1$  | $-0.22 \pm 0.1$                                                                 | $18 \pm 1$    | $4 \pm 1$    |              |
| Outer chains + protein   | $14 \pm 1$  | $0.10/0.06/0.02/-0.02 \pm 0.1$                                                  | $18 \pm 1$    | $3 \pm 1$    | $10 \pm 5^a$ |
| Outer heads + protein    | $8 \pm 1$   | $3.0/2.8/2.5/2.3 \pm 0.2$                                                       | $50 \pm 3$    | $3 \pm 1$    | $18 \pm 8^a$ |
| Protein layer 1          | $40 \pm 5$  | $3.0/2.6/2.2/1.8 \pm 0.2$                                                       | $80 \pm 2^h$  | $3 \pm 1$    | $20 \pm 2^c$ |
| Protein layer 2          | $60 \pm 15$ | $3.0/2.6/2.2/1.8 \pm 0.2$                                                       | $87 \pm 2^i$  | $4 \pm 1$    | $13 \pm 2^c$ |
| Protein layer 3          | $60 \pm 15$ | $3.0/2.6/2.2/1.8 \pm 0.2$                                                       | $91 \pm 2^j$  | $10 \pm 1$   | $9 \pm 2^c$  |
| Protein layer 4          | $60 \pm 15$ | $3.0/2.6/2.2/1.8 \pm 0.2$                                                       | $92 \pm 2^k$  | $10 \pm 1$   | $8 \pm 2^c$  |
| Protein layer 5          | $70 \pm 15$ | $3.0/2.6/2.2/1.8 \pm 0.2$                                                       | $95 \pm 2^l$  | $10 \pm 1$   | $5 \pm 2^c$  |

<sup>a</sup> Relative to the lipids.

<sup>b</sup>  $91 \pm 3\%$  in H<sub>2</sub>O,  $97 \pm 3\%$  in D<sub>2</sub>O,  $70 \pm 50\%$  in CMSi,  $70 \pm 3\%$  in CM4.

<sup>c</sup> Relative to water.

<sup>d</sup>  $95 \pm 3\%$  in H<sub>2</sub>O,  $93 \pm 3\%$  in D<sub>2</sub>O,  $96 \pm 50\%$  in CMSi,  $84 \pm 3\%$  in CM4.

<sup>e</sup>  $96 \pm 3\%$  in H<sub>2</sub>O,  $97 \pm 3\%$  in D<sub>2</sub>O,  $98 \pm 50\%$  in CMSi,  $94 \pm 3\%$  in CM4.

<sup>f</sup>  $98 \pm 3\%$  in H<sub>2</sub>O,  $98 \pm 3\%$  in D<sub>2</sub>O,  $98 \pm 50\%$  in CMSi,  $94 \pm 3\%$  in CM4.

<sup>g</sup>  $100 \pm 3\%$  in H<sub>2</sub>O,  $100 \pm 3\%$  in D<sub>2</sub>O,  $100 \pm 50\%$  in CMSi,  $96 \pm 3\%$  in CM4.

<sup>h</sup>  $94 \pm 3\%$  in H<sub>2</sub>O,  $98 \pm 3\%$  in D<sub>2</sub>O,  $70 \pm 50\%$  in CMSi,  $80 \pm 3\%$  in CM4.

<sup>i</sup>  $96 \pm 3\%$  in H<sub>2</sub>O,  $90 \pm 3\%$  in D<sub>2</sub>O,  $100 \pm 50\%$  in CMSi,  $87 \pm 3\%$  in CM4.

<sup>j</sup>  $99 \pm 3\%$  in H<sub>2</sub>O,  $94 \pm 3\%$  in D<sub>2</sub>O,  $100 \pm 50\%$  in CMSi,  $91 \pm 3\%$  in CM4.

<sup>k</sup>  $100 \pm 3\%$  in H<sub>2</sub>O,  $97 \pm 3\%$  in D<sub>2</sub>O,  $100 \pm 50\%$  in CMSi,  $92 \pm 3\%$  in CM4.

<sup>l</sup>  $100 \pm 3\%$  in H<sub>2</sub>O,  $99 \pm 3\%$  in D<sub>2</sub>O,  $100 \pm 50\%$  in CMSi,  $95 \pm 3\%$  in CM4.

**Table S11.** Parameters corresponding to the best fits to the data from *Candida glabrata* bilayers supplemented with Q<sub>10</sub> before and after addition of HsΔ29DHODH, and after rinse, as displayed in Figure 7. Fitting uncertainties are given for the most sensitive contrast.

| Lipid Bilayer          |            |                                                                                       |                     |              |                                                                                                                                                                                   |
|------------------------|------------|---------------------------------------------------------------------------------------|---------------------|--------------|-----------------------------------------------------------------------------------------------------------------------------------------------------------------------------------|
| Layer                  | $\tau$ (Å) | $\rho$ ( $10^{-6}$ Å <sup>-2</sup> )                                                  | $\phi$ (vol%)       | $\sigma$ (Å) | vol% Q <sub>10</sub>                                                                                                                                                              |
| Inner lipid heads      | 9 ± 1      | 3.0/2.8/2.6/2.4 ± 0.2                                                                 | 46 ± 5              | 3 ± 1        | 57 ± 14 <sup>a</sup>                                                                                                                                                              |
| Inner lipid chains     | 13 ± 1     | -0.22 ± 0.1                                                                           | 2 ± 2               | 4 ± 1        |                                                                                                                                                                                   |
| Ubiquinone layer       | 4 ± 1      | 0.19 ± 0.1                                                                            | 2 ± 2               | 1 ± 1        |                                                                                                                                                                                   |
| Outer lipid chains     | 13 ± 1     | -0.22 ± 0.1                                                                           | 2 ± 2               | 1 ± 1        |                                                                                                                                                                                   |
| Outer lipid heads      | 9 ± 1      | 3.0/2.8/2.6/2.4 ± 0.2                                                                 | 49 ± 5              | 3 ± 1        |                                                                                                                                                                                   |
| Bilayer + Protein      |            |                                                                                       |                     |              |                                                                                                                                                                                   |
| Layer                  | $\tau$ (Å) | $\rho$ ( $10^{-6}$ Å <sup>-2</sup> ) in<br>D <sub>2</sub> O/CM4/CMSi/H <sub>2</sub> O | $\phi$ (vol%)       | $\sigma$ (Å) | vol% DHODH                                                                                                                                                                        |
| Inner lipid heads      | 9 ± 1      | 3.0/2.8/2.6/2.4 ± 0.2                                                                 | 53 ± 5              | 5 ± 1        | 10 ± 5 <sup>a</sup><br>18 ± 8 <sup>a</sup><br>30 ± 3 <sup>c</sup><br>16 ± 3 <sup>c</sup><br>10 ± 3 <sup>c</sup><br>9 ± 3 <sup>c</sup><br>7 ± 3 <sup>c</sup><br>6 ± 3 <sup>c</sup> |
| Inner lipid chains     | 13 ± 1     | -0.22 ± 0.1                                                                           | 10 ± 2              | 4 ± 1        |                                                                                                                                                                                   |
| Ubiquinone layer       | 4 ± 1      | 0.19 ± 0.1                                                                            | 10 ± 2              | 1 ± 1        |                                                                                                                                                                                   |
| Outer chains + protein | 13 ± 1     | 0.10/0.06/0.02/-0.02 ± 0.1                                                            | 10 ± 2              | 1 ± 1        |                                                                                                                                                                                   |
| Outer heads + protein  | 8 ± 1      | 3.0/2.8/2.5/2.3 ± 0.2                                                                 | 50 ± 5              | 4 ± 1        |                                                                                                                                                                                   |
| Protein layer 1        | 40 ± 5     | 3.0/2.6/2.2/1.8 ± 0.2                                                                 | 70 ± 3 <sup>b</sup> | 6 ± 1        |                                                                                                                                                                                   |
| Protein layer 2        | 70 ± 15    | 3.0/2.6/2.2/1.8 ± 0.2                                                                 | 84 ± 3 <sup>d</sup> | 10 ± 1       |                                                                                                                                                                                   |
| Protein layer 3        | 75 ± 15    | 3.0/2.6/2.2/1.8 ± 0.2                                                                 | 90 ± 3 <sup>e</sup> | 10 ± 1       |                                                                                                                                                                                   |
| Protein layer 4        | 75 ± 15    | 3.0/2.6/2.2/1.8 ± 0.2                                                                 | 91 ± 3 <sup>f</sup> | 10 ± 1       |                                                                                                                                                                                   |
| Protein layer 5        | 75 ± 15    | 3.0/2.6/2.2/1.8 ± 0.2                                                                 | 93 ± 3 <sup>g</sup> | 10 ± 1       |                                                                                                                                                                                   |
| Protein layer 6        | 75 ± 15    | 3.0/2.6/2.2/1.8 ± 0.2                                                                 | 94 ± 3 <sup>h</sup> | 10 ± 1       |                                                                                                                                                                                   |
| After Rinse            |            |                                                                                       |                     |              |                                                                                                                                                                                   |
| Layer                  | $\tau$ (Å) | $\rho$ ( $10^{-6}$ Å <sup>-2</sup> ) in<br>D <sub>2</sub> O/CM4/CMSi/H <sub>2</sub> O | $\phi$ (vol%)       | $\sigma$ (Å) | vol% DHODH                                                                                                                                                                        |
| Inner lipid heads      | 9 ± 1      | 3.0/2.8/2.6/2.4 ± 0.2                                                                 | 55 ± 5              | 4 ± 1        | 10 ± 5 <sup>a</sup><br>18 ± 8 <sup>a</sup><br>15 ± 3 <sup>c</sup><br>14 ± 3 <sup>c</sup><br>14 ± 3 <sup>c</sup><br>9 ± 3 <sup>c</sup><br>7 ± 3 <sup>c</sup><br>5 ± 3 <sup>c</sup> |
| Inner lipid chains     | 13 ± 1     | -0.22 ± 0.1                                                                           | 14 ± 2              | 4 ± 1        |                                                                                                                                                                                   |
| Ubiquinone layer       | 4 ± 1      | 0.19 ± 0.1                                                                            | 14 ± 2              | 1 ± 1        |                                                                                                                                                                                   |
| Outer chains + protein | 12 ± 1     | 0.10/0.06/0.02/-0.02 ± 0.1                                                            | 14 ± 2              | 1 ± 1        |                                                                                                                                                                                   |
| Outer heads + protein  | 8 ± 1      | 3.0/2.8/2.5/2.3 ± 0.2                                                                 | 54 ± 5              | 4 ± 1        |                                                                                                                                                                                   |
| Protein layer 1        | 45 ± 5     | 3.0/2.6/2.2/1.8 ± 0.2                                                                 | 85 ± 3 <sup>i</sup> | 4 ± 1        |                                                                                                                                                                                   |
| Protein layer 2        | 75 ± 15    | 3.0/2.6/2.2/1.8 ± 0.2                                                                 | 86 ± 3 <sup>j</sup> | 10 ± 1       |                                                                                                                                                                                   |
| Protein layer 3        | 75 ± 15    | 3.0/2.6/2.2/1.8 ± 0.2                                                                 | 86 ± 3 <sup>k</sup> | 10 ± 1       |                                                                                                                                                                                   |
| Protein layer 4        | 70 ± 15    | 3.0/2.6/2.2/1.8 ± 0.2                                                                 | 91 ± 3 <sup>l</sup> | 10 ± 1       |                                                                                                                                                                                   |
| Protein layer 5        | 75 ± 15    | 3.0/2.6/2.2/1.8 ± 0.2                                                                 | 93 ± 3 <sup>m</sup> | 10 ± 1       |                                                                                                                                                                                   |
| Protein layer 6        | 75 ± 15    | 3.0/2.6/2.2/1.8 ± 0.2                                                                 | 95 ± 3 <sup>n</sup> | 10 ± 1       |                                                                                                                                                                                   |

<sup>a</sup> Relative to the lipids.

<sup>b</sup> 82 ± 3% in H<sub>2</sub>O, 88 ± 3% in D<sub>2</sub>O, 82 ± 50% in CMSi, 70 ± 3% in CM4.

<sup>c</sup> Relative to water.

<sup>d</sup> 97 ± 3% in H<sub>2</sub>O, 94 ± 3% in D<sub>2</sub>O, 100 ± 50% in CMSi, 84 ± 3% in CM4.

<sup>e</sup> 100 ± 3% in H<sub>2</sub>O, 95 ± 3% in D<sub>2</sub>O, 100 ± 50% in CMSi, 90 ± 3% in CM4.

<sup>f</sup> 100 ± 3% in H<sub>2</sub>O, 96 ± 3% in D<sub>2</sub>O, 100 ± 50% in CMSi, 91 ± 3% in CM4.

<sup>g</sup> 100 ± 3% in H<sub>2</sub>O, 98 ± 3% in D<sub>2</sub>O, 100 ± 50% in CMSi, 93 ± 3% in CM4.

<sup>h</sup> 100 ± 3% in H<sub>2</sub>O, 99 ± 3% in D<sub>2</sub>O, 100 ± 50% in CMSi, 94 ± 3% in CM4.

<sup>i</sup> 91 ± 3% in H<sub>2</sub>O, 96 ± 3% in D<sub>2</sub>O, 80 ± 50% in CMSi, 85 ± 3% in CM4.

<sup>j</sup> 97 ± 3% in H<sub>2</sub>O, 87 ± 3% in D<sub>2</sub>O, 100 ± 50% in CMSi, 86 ± 3% in CM4.

<sup>k</sup> 100 ± 3% in H<sub>2</sub>O, 92 ± 3% in D<sub>2</sub>O, 100 ± 50% in CMSi, 86 ± 3% in CM4.

<sup>l</sup> 100 ± 3% in H<sub>2</sub>O, 95 ± 3% in D<sub>2</sub>O, 100 ± 50% in CMSi, 91 ± 3% in CM4.

<sup>m</sup> 100 ± 3% in H<sub>2</sub>O, 98 ± 3% in D<sub>2</sub>O, 100 ± 50% in CMSi, 93 ± 3% in CM4.

<sup>n</sup> 100 ± 3% in H<sub>2</sub>O, 100 ± 3% in D<sub>2</sub>O, 100 ± 50% in CMSi, 95 ± 3% in CM4.

**Table S12.** Parameters corresponding to the best fits to the data from bacterial mimic membranes before and after addition of *Ec*DHODH, and after rinse, as displayed in Figure 8. Fitting uncertainties are given for the most sensitive contrast.

| <b>Lipid Bilayer</b>     |             |                                                                                      |               |              |              |
|--------------------------|-------------|--------------------------------------------------------------------------------------|---------------|--------------|--------------|
| Layer                    | $\tau$ (Å)  | $\rho$ ( $10^{-6} \text{ Å}^{-2}$ )                                                  | $\phi$ (vol%) | $\sigma$ (Å) |              |
| Inner lipid heads        | $9 \pm 1$   | $2.9/2.7/2.6/2.4 \pm 0.2$                                                            | $56 \pm 8$    | $4 \pm 1$    |              |
| Inner lipid chains       | $16 \pm 1$  | $-0.27 \pm 0.1$                                                                      | $9 \pm 2$     | $6 \pm 1$    |              |
| Outer lipid chains       | $16 \pm 1$  | $-0.27 \pm 0.1$                                                                      | $9 \pm 2$     | $3 \pm 1$    |              |
| Outer lipid heads        | $9 \pm 1$   | $2.9/2.7/2.6/2.4 \pm 0.2$                                                            | $56 \pm 8$    | $6 \pm 1$    |              |
| <b>Bilayer + Protein</b> |             |                                                                                      |               |              |              |
| Layer                    | $\tau$ (Å)  | $\rho$ ( $10^{-6} \text{ Å}^{-2}$ ) in<br>D <sub>2</sub> O/CM4/CMSi/H <sub>2</sub> O | $\phi$ (vol%) | $\sigma$ (Å) | vol% DHODH   |
| Inner lipid heads        | $9 \pm 1$   | $2.9/2.7/2.6/2.4 \pm 0.2$                                                            | $60 \pm 8$    | $5 \pm 1$    |              |
| Inner lipid chains       | $16 \pm 1$  | $-0.27 \pm 0.1^a$                                                                    | $16 \pm 2^b$  | $6 \pm 1$    |              |
| Outer chains + protein   | $15 \pm 1$  | $0.55/0.45/0.35/0.11 \pm 0.1$                                                        | $16 \pm 2^b$  | $4 \pm 1$    | $25 \pm 6^c$ |
| Outer heads + protein    | $8 \pm 1$   | $2.9/2.7/2.5/2.3 \pm 0.2$                                                            | $62 \pm 5$    | $5 \pm 1$    | $56 \pm 8^c$ |
| Protein layer 1          | $40 \pm 5$  | $3.0/2.6/2.2/1.8 \pm 0.2$                                                            | $63 \pm 2^d$  | $5 \pm 1$    | $37 \pm 2^e$ |
| Protein layer 2          | $75 \pm 15$ | $3.0/2.6/2.2/1.8 \pm 0.2$                                                            | $86 \pm 3^f$  | $5 \pm 1$    | $14 \pm 3^e$ |
| Protein layer 3          | $75 \pm 15$ | $3.0/2.6/2.2/1.8 \pm 0.2$                                                            | $93 \pm 3^g$  | $10 \pm 1$   | $7 \pm 3^e$  |
| <b>After Rinse</b>       |             |                                                                                      |               |              |              |
| Layer                    | $\tau$ (Å)  | $\rho$ ( $10^{-6} \text{ Å}^{-2}$ ) in<br>D <sub>2</sub> O/CM4/CMSi/H <sub>2</sub> O | $\phi$ (vol%) | $\sigma$ (Å) | vol% DHODH   |
| Inner lipid heads        | $9 \pm 1$   | $2.9/2.7/2.6/2.4 \pm 0.2$                                                            | $60 \pm 8$    | $5 \pm 1$    |              |
| Inner lipid chains       | $16 \pm 1$  | $-0.27 \pm 0.1^a$                                                                    | $19 \pm 2^b$  | $6 \pm 1$    |              |
| Outer chains + protein   | $15 \pm 1$  | $0.55/0.45/0.35/0.11 \pm 0.1$                                                        | $19 \pm 2^b$  | $4 \pm 1$    | $25 \pm 6^c$ |
| Outer heads + protein    | $8 \pm 1$   | $2.9/2.7/2.5/2.3 \pm 0.2$                                                            | $66 \pm 5$    | $3 \pm 1$    | $56 \pm 8^c$ |
| Protein layer 1          | $40 \pm 5$  | $3.0/2.6/2.2/1.8 \pm 0.2$                                                            | $66 \pm 2^h$  | $8 \pm 1$    | $34 \pm 2^e$ |
| Protein layer 2          | $75 \pm 15$ | $3.0/2.6/2.2/1.8 \pm 0.2$                                                            | $86 \pm 3^i$  | $8 \pm 1$    | $14 \pm 3^e$ |
| Protein layer 3          | $60 \pm 15$ | $3.0/2.6/2.2/1.8 \pm 0.2$                                                            | $92 \pm 3^j$  | $10 \pm 1$   | $8 \pm 3^e$  |
| Protein layer 4          | $60 \pm 15$ | $3.0/2.6/2.2/1.8 \pm 0.2$                                                            | $98 \pm 3^k$  | $10 \pm 1$   | $2 \pm 3^e$  |

<sup>a</sup>  $0.11 \pm 0.1 \times 10^{-6} \text{ Å}^{-2}$  in H<sub>2</sub>O.

<sup>b</sup>  $0 \pm 2$  vol% for H<sub>2</sub>O.

<sup>c</sup> Relative to the lipids.

<sup>d</sup>  $66 \pm 3\%$  in H<sub>2</sub>O,  $75 \pm 50\%$  in CMSi,  $70 \pm 3\%$  in CM4,  $63 \pm 3\%$  in D<sub>2</sub>O.

<sup>e</sup> Relative to water.

<sup>f</sup>  $93 \pm 3\%$  in H<sub>2</sub>O,  $92 \pm 50\%$  in CMSi,  $93 \pm 3\%$  in CM4,  $86 \pm 3\%$  in D<sub>2</sub>O.

<sup>g</sup>  $96 \pm 3\%$  in H<sub>2</sub>O,  $97 \pm 50\%$  in CMSi,  $94 \pm 3\%$  in CM4,  $93 \pm 3\%$  in D<sub>2</sub>O.

<sup>h</sup>  $74 \pm 3\%$  in H<sub>2</sub>O,  $88 \pm 50\%$  in CMSi,  $76 \pm 3\%$  in CM4,  $66 \pm 3\%$  in D<sub>2</sub>O.

<sup>i</sup>  $96 \pm 3\%$  in H<sub>2</sub>O,  $86 \pm 50\%$  in CMSi,  $90 \pm 3\%$  in CM4,  $86 \pm 3\%$  in D<sub>2</sub>O.

<sup>j</sup>  $98 \pm 3\%$  in H<sub>2</sub>O,  $90 \pm 50\%$  in CMSi,  $91 \pm 3\%$  in CM4,  $92 \pm 3\%$  in D<sub>2</sub>O.

<sup>k</sup>  $100 \pm 3\%$  in H<sub>2</sub>O,  $100 \pm 50\%$  in CMSi,  $98 \pm 3\%$  in CM4,  $98 \pm 3\%$  in D<sub>2</sub>O.

**Figure S3.** Multiple sequence alignment of Class II DHODHs of which a crystal structure including the  $\alpha 1$ - $\alpha 2$  microdomain is available. The alignment was done with CLUSTAL OMEGA (1.2.4) [77]. PLAF: *Plasmodium falciparum* PDB 6155; ECOLI: *Escherichia coli* PDB 1F76; SCHMA *Schistosoma mansoni* PDB 6UY4; HUMAN: *Homo sapiens* PDB 2PRM; RAT: *Rattus rattus* PDB 1UUM. The respective UniProt identifiers for the amino acid sequences used in the alignment are given to the left of each row between vertical lines. Amino acid stretches corresponding to  $\alpha 1$ - $\alpha 2$  microdomain according to the PDB entries are underlined. Cationic amino acid residues in these regions are marked in yellow.

|                        |                                                                       |     |
|------------------------|-----------------------------------------------------------------------|-----|
| tr Q54A96 Q54A96_PLAFA | MISLKLKPQFMFLPKKHILSYCRKDVNLNLFQKFFYYTSKRKESNNMKNESLLRLINYNRY         | 60  |
| sp P0A7E1 PYRD_ECOLI   | -----                                                                 | 0   |
| tr G4VFD7 G4VFD7_SCHMA | -----                                                                 | 0   |
| sp Q02127 PYRD_HUMAN   | -----                                                                 | 0   |
| sp Q63707 PYRD_RAT     | -----                                                                 | 0   |
| tr Q54A96 Q54A96_PLAFA | NKIDSNNYYNGGKILSNDRQYIYSPLCEYKKKINDISSYVSPFKINIRNLGTSNFFVNNK          | 120 |
| sp P0A7E1 PYRD_ECOLI   | -----                                                                 | 0   |
| tr G4VFD7 G4VFD7_SCHMA | -----                                                                 | 0   |
| sp Q02127 PYRD_HUMAN   | -----                                                                 | 0   |
| sp Q63707 PYRD_RAT     | -----                                                                 | 0   |
| tr Q54A96 Q54A96_PLAFA | KDVLNDNDYIYENIKKEKSKHKKIIFLLFVSLFGLYGFESY-NPEFFLYDIFL-KFCLKY          | 178 |
| sp P0A7E1 PYRD_ECOLI   | -----MYYPF--VRKALFQ                                                   | 12  |
| tr G4VFD7 G4VFD7_SCHMA | -----MSRIRT-SLEV---LSLGFGLFTAEALYSGNEHFYKDWFLPTARLLV                  | 43  |
| sp Q02127 PYRD_HUMAN   | -----MAWRHLKKRAQD-AVII---LGGGGLLFASYLMATGDEFYAEHLMPITLQGLL            | 49  |
| sp Q63707 PYRD_RAT     | -----MAWRQLRKRALD-AVII---LGGGGLLFTSYLTATGDDHFFYAEYLMPLQRL             | 49  |
| tr Q54A96 Q54A96_PLAFA | IDGEICHDLFLLLGK---YNILPYDTSNDSIYACTNIKHLDFINPFVGAAGFDKNGVCID          | 235 |
| sp P0A7E1 PYRD_ECOLI   | LDPERAHEFTFQQLRRITGTTFEALVRQKVPKPVNCMGLTFKNPLGLAAGLDKDGECID           | 72  |
| tr G4VFD7 G4VFD7_SCHMA | RDGETAHNLSVYLAS---YGFIPHKQRNSFPQLCKVFGLEFDHPITGLAAGFDKDKGAFTM         | 100 |
| sp Q02127 PYRD_HUMAN   | -DPESAHLRAVRFTS---LGLLPRARFQSDMLFVRVLGHKFRNPVGIAAGFDKKGAEVD           | 105 |
| sp Q63707 PYRD_RAT     | -DPESAHLRAVRVTS---LGLLPRATFQSDMLFVKVLGHKFRNPVGIAAGFDKNGEAVD           | 105 |
|                        | * * * . : . : : : : . : * : * . : * : * : * : * . .                   |     |
| tr Q54A96 Q54A96_PLAFA | SILKLGFSEFIEIGTITPRGQTGNAPRIFRDESRSIINSCGFNNMGCDKVTENLILFRK           | 295 |
| sp P0A7E1 PYRD_ECOLI   | ALGAMGFGSIEIGTVTPRPQPGNDKPRFLRLVDAEGLINRMGFNNLGVNDLVENVKKAHY          | 132 |
| tr G4VFD7 G4VFD7_SCHMA | GLLNAGFSHIEVGTVPNPQLGNARPRIFRWTEKEAVVNRCGFNSDGHDAVERLKDPRW            | 160 |
| sp Q02127 PYRD_HUMAN   | GLYKMGFGFVEIGSVTPKPQEGNPRPRVFRLEPDQAVINRYGFNSHGLSVVEHRLRARQQ          | 165 |
| sp Q63707 PYRD_RAT     | GLYKLGFGFVEVGSVTPQPEGNPRPRVFRLEPDQAVINRYGFNSHGLSVVEHRLRARQQ           | 165 |
|                        | . : * * . : * : * : * . * * * : * : * : * : * : * : * : * . . : . :   |     |
| tr Q54A96 Q54A96_PLAFA | RQEEDKLLSKHIVGSIGKNKDT--VNIVDDLKYCINKIGRYADYIAINVSSPNTPLGRD           | 353 |
| sp P0A7E1 PYRD_ECOLI   | -----DGVLGINIGKNKDTPEVQKDDYLICMEKIYAYAGYIAINISSPNTPLGRD               | 183 |
| tr G4VFD7 G4VFD7_SCHMA | E-----GRGVIQVNLGCKNTS--ADPTADYVAGVRKFGEVADYLVINVSSPNTPLGRS            | 211 |
| sp Q02127 PYRD_HUMAN   | KQ-AKLTEDGLPLGVNLGKNKTS--VDAADYAEGVRLGLADYLVNVSSPNTAGLRS              | 222 |
| sp Q63707 PYRD_RAT     | KQ-AQLTADGLPLGINLGNKNTS--EDAAADYAEGVRLGLADYLVNVSSPNTAGLRS             | 222 |
|                        | : * : . : * * : : : * : : : * : * : * : * : * : * : * : * : * : * : * |     |
| tr Q54A96 Q54A96_PLAFA | NQEAGKLKNIILSVKEEIDNLEKNNIMNDESTYNEDNKIVEKKNFNKNNSHMMKDAKDN           | 413 |
| sp P0A7E1 PYRD_ECOLI   | LQYGEALDDLLTAIKNKQNDLQA                                               | 206 |
| tr G4VFD7 G4VFD7_SCHMA | LQTKELRDLLSKVLAARNQLSK                                                | 234 |
| sp Q02127 PYRD_HUMAN   | LQGAELRRLTKVLQERDGLRR                                                 | 245 |
| sp Q63707 PYRD_RAT     | LQGKTELRLHLLSKVLQERDALG                                               | 245 |
|                        | * * * : : : : *                                                       |     |
| tr Q54A96 Q54A96_PLAFA | FLWFNTTKKKPLVFKLAPDLNQEKKKEIADVL--LETNIDGMIISNTTTQIND-----            | 465 |
| sp P0A7E1 PYRD_ECOLI   | -----MHHKYVPIAVKIAPDLSEELIQVADSL--VRHNIDGVIATNTTLDRSL-----            | 253 |
| tr G4VFD7 G4VFD7_SCHMA | -----KTPILKISPENNDQNLKDIVEVALDSKTRIDGMIISNTTLTTYEEAVACG               | 285 |
| sp Q02127 PYRD_HUMAN   | -----VH--RPAVLVKIAPDLTSQDKEDIASVV--KELGIDGLIVTNTTVSRP-----            | 289 |
| sp Q63707 PYRD_RAT     | -----TR--KPAVLVKIAPDLTAQDKEDIASVA--RELGIDGLIVTNTTVSRP-----            | 289 |
|                        | : * : * : * . : : : . . . * : * : * : * : *                           |     |
| tr Q54A96 Q54A96_PLAFA | -----IKSFENKKGVSQAKLKDISTKFCICEMNYTNKQIPPIASGGIFSGLDALKIE             | 519 |
| sp P0A7E1 PYRD_ECOLI   | ----VQGMKNCDQTGGSLGRPLQLKSTEIIRRLSLELNGRLPIIGVGGIDSVIAAREKIA          | 309 |
| tr G4VFD7 G4VFD7_SCHMA | AAPIPGNNKQNVVYGGSLGRPLFEKSTDCLRKVSALTGAIPLIGVGGISCGEDALSRLN           | 345 |
| sp Q02127 PYRD_HUMAN   | ---AGLQGALRSETGGSLGKPLRDLSTQITIREMYALTQGRVPIIGVGGVSSGQDALEKIR         | 346 |
| sp Q63707 PYRD_RAT     | ---VGLQGALRSETGGSLGKPLRDLSTQITIREMYALTQGRVPIIGVGGVSSGQDALEKIQ         | 346 |
|                        | * * : * * * * : : : : : : * : * : * : * : *                           |     |
| tr Q54A96 Q54A96_PLAFA | AGASVCQLYSCLVFNMGMSAVQIKRELNHLLYQRGYYNLKEAIGRKHSKS                    | 569 |
| sp P0A7E1 PYRD_ECOLI   | AGASLVQIYSGFIFKGPPLIKEIVTHI-----                                      | 336 |
| tr G4VFD7 G4VFD7_SCHMA | AGASLVQLYTSFVYQGPVVAHKVAREINKLKMTS-----                               | 379 |
| sp Q02127 PYRD_HUMAN   | AGASLVQLYTALTFWGPPVVGKVKRELEALLKEQGGVTDGADHRR-                        | 395 |
| sp Q63707 PYRD_RAT     | AGASLVQLYTALIFLGPVVRVKRELEALLKERGFTTVTDAIGADHRR-                      | 395 |
|                        | **** : * : : : * : : : *                                              |     |
